# Supplementary material
Source: HighWire-hosted journal article supplement (https://jnm.snmjournals.org/highwire/filestream/104229/field_highwire_adjunct_files/0/259192_Supplemental_Data.pdf)
Supplement: 259192_Supplemental_Data.pdf [file 259192_Supplemental_Data.pdf]

**Supplemental Table 1** Pre-therapeutic SUVmax in representative target lesions in liver, lymph node and osseous metastases on Ga-68 FAP-2286 PET/CT (\* indicates no respective target lesion with a significant uptake)

| Patient ID | SUVmax lesion 1 (Hepatic)               | SUVmax lesion 2 (Lymph node) | SUVmax lesion 3 (Osseous) | SUVmax normal liver |
|------------|-----------------------------------------|------------------------------|---------------------------|---------------------|
| 1          | 11.4                                    | 10                           | 6.9                       | 2.7                 |
| 2          | *                                       | 15.5                         | *                         | 4.1                 |
| 3          | 11.2                                    | 9.5                          | 8.3                       | 4.8                 |
| 4          | 23.2                                    | 22.8                         | 5.6                       | 4                   |
| 5          | No Ga-68 FAP-2286 PET/CT before therapy |                              |                           |                     |
| 6          | 5.1                                     | 10.9                         | 30.1                      | 2.1                 |
| 7          | 6.5                                     | 7.1                          | 16.1                      | 3.2                 |
| 8          | 5.4                                     | 6.6                          | 27.6                      | 3.7                 |
| 9          | *                                       | 14                           | 8                         | 2.8                 |
| 10         | *                                       | 16.6                         | *                         | 2.4                 |
| 11         | 10.6                                    | 7.7                          | 3.6                       | 1.4                 |

**Supplemental Table 2** Administered radioactivity of  $^{177}\text{Lu}$ -FAP-2286, total expressed as MBq (and per kg body weight as MBq/kg in brackets)

| Pt. no. | Cycle 1     | Cycle 2      | Cycle 3     |
|---------|-------------|--------------|-------------|
| 1       | 5400 (63.5) | 9900 (116.5) |             |
| 2       | 3500 (59.3) | 7000 (118.6) |             |
| 3       | 5900 (75.6) | 9000 (115.4) |             |
| 4       | 6300 (71.6) | 9900 (112.5) |             |
| 5       | 5900 (118)  | 5100 (102)   |             |
| 6       | 2400 (36.9) | 5900 (90.8)  |             |
| 7       | 3900 (67.2) | 5900 (101.7) |             |
| 8       | 3400 (54.0) | 6000 (95.2)  | 5000 (79.4) |
| 9       | 3700 (38.9) | 5800 (61.1)  |             |
| 10      | 3500 (63.6) | 7000 (127.2) |             |
| 11      | 6500 (87.8) |              |             |

**Supplemental Table 3** SUVmax of tumor lesions on  $^{177}\text{Lu}$ -FAP-2286 SPECT/CT at the respective time points

| patient number | dosimetry number | lesion number | SUVmax      | SPECT/CT h p.i. |
|----------------|------------------|---------------|-------------|-----------------|
| 1              | 1                | 1             | 11.35       | 42              |
| 4              | 1                | 1             | 17.19       | 42              |
| 6              | 1                | 1             | 16.97       | 44              |
| 6              | 2                | 1             | no SPECT/CT |                 |
| 6              | 2                | 2             | no SPECT/CT |                 |
| 7              | 1                | 1             | 5.93        | 50              |
| 7              | 1                | 2             | 7.96        | 44              |
| 7              | 2                | 1             | no SPECT/CT |                 |
| 8              | 1                | 1             | 1.89        | 91              |
| 8              | 1                | 2             | 4.51        | 91              |
| 8              | 1                | 3             | 6.06        | 90              |
| 8              | 2                | 1             | 5.61        | 69              |
| 8              | 2                | 2             | 10.37       | 69              |
| 8              | 2                | 3             | no SPECT/CT |                 |

**Supplemental Table 4** SUVmax of kidneys on <sup>177</sup>Lu-FAP-2286 SPECT/CT

| patient number | dosimetry number | SUVmax kidney right | SUVmax kidney left | SPECT/CT h p.i. |
|----------------|------------------|---------------------|--------------------|-----------------|
| 1              | 1                | 10.71               | 10.19              | 42              |
| 4              | 1                | 9.42                | 7.51               | 42              |
| 5              | 1                | 4.88                | 8.26               | 68              |
| 6              | 1                | 8.34                | 9,78               | 49              |
| 6              | 2                |                     | no SPECT/CT        |                 |
| 7              | 1                | 11.8                | 9.98               | 50              |
| 7              | 2                | 4.13                | 4.33               | 68              |
| 8              | 1                | 18.95               | 14.13              | 90              |
| 8              | 2                | 14.17               | 14.51              | 69              |
| 10             | 1                | 9.23                | 7.94               | 42              |

**Supplemental Table 5** Dose estimations in whole body, kidneys, and red marrow

| Pt. no.                                | Dosimetry number   | Effective half-life in hours |         | Mean absorbed dose in Gy/GBq |         | Mean absorbed red marrow dose in Gy/GBq |
|----------------------------------------|--------------------|------------------------------|---------|------------------------------|---------|-----------------------------------------|
|                                        |                    | Whole body                   | Kidneys | Whole body                   | Kidneys |                                         |
| 1                                      | 1                  | 29                           | 61      | 0.05                         | 0.6     | 0.04*                                   |
| 4                                      | 1                  | 30                           | 41      | 0.05                         | 0.5     | 0.04*                                   |
| 5                                      | 1                  | 28                           | 43      | 0.05                         | 0.5     | 0.04#                                   |
| 6                                      | 1                  | 45                           | 67      | 0.10                         | 0.6     | 0.09*                                   |
| 6                                      | 2                  | 48                           | 161     | 0.10                         | 1.4     | 0.07#                                   |
| 7                                      | 1                  | 26                           | 80      | 0.06                         | 0.9     | 0.04#                                   |
| 7                                      | 2                  | 25                           | 30      | 0.04                         | 0.4     | 0.03#                                   |
| 8                                      | 1                  | 42                           | 134     | 0.08                         | 2.0     | 0.07*                                   |
| 8                                      | 2                  | 42                           | 160     | 0.09                         | 2.0     | 0.06#                                   |
| 10                                     | 1                  | 30                           | 38      | 0.06                         | 0.6     | 0.04#                                   |
| <sup>177</sup> Lu-FAP-2286 (10 cycles) | Mean               | 35                           | 81      | 0.07                         | 1.0     | 0.05                                    |
|                                        | Standard deviation | 9                            | 51      | 0.02                         | 0.6     | 0.02                                    |

\*dose estimation based on blood sampling

#dose estimation without blood sampling, and based on whole body activity distribution

**Supplemental Table 6** Dose estimations in metastases

| Pt. no.                                   | Dosimetry no.      | Lesion no. | Effective half-life in hours |                  | Mean absorbed dose in Gy/GBq |                  |
|-------------------------------------------|--------------------|------------|------------------------------|------------------|------------------------------|------------------|
|                                           |                    |            | Bone metastases              | Liver metastases | Bone metastases              | Liver metastases |
| 1                                         | 1                  | 1          | 39                           |                  | 3.5                          |                  |
| 4                                         | 1                  | 1          |                              | 32               |                              | 0.4              |
| 6                                         | 1                  | 1          | 41                           |                  | 1.0                          |                  |
| 6                                         | 2                  | 1          | 44                           |                  | 1.0                          |                  |
|                                           |                    | 2          | 42                           |                  | 3.4                          |                  |
| 7                                         | 1                  | 1          | 28                           |                  | 2.0                          |                  |
|                                           |                    | 2          | 24                           |                  | 0.9                          |                  |
| 7                                         | 2                  | 1          | 21                           |                  | 1.1                          |                  |
| 8                                         | 1                  | 1          | 42                           |                  | 0.8                          |                  |
|                                           |                    | 2          | 32                           |                  | 0.5                          |                  |
|                                           |                    | 3          | 31                           |                  | 0.9                          |                  |
| 8                                         | 2                  | 1          | 120                          |                  | 10.6                         |                  |
|                                           |                    | 2          | 43                           |                  | 2.6                          |                  |
|                                           |                    | 3          | 60                           |                  | 7.2                          |                  |
| <sup>177</sup> Lu-FAP-2286<br>(10 cycles) | Mean               |            | 44                           |                  | 3.0                          |                  |
|                                           | Standard deviation |            | 25                           |                  | 2.7                          |                  |

**Supplemental Table 7** Dose estimations in all organs

| patient number   | 1           | 4           | 5           | 6           | 6           | 7           | 7           | 8           | 8           | 10          | Mean        | Standard deviation |
|------------------|-------------|-------------|-------------|-------------|-------------|-------------|-------------|-------------|-------------|-------------|-------------|--------------------|
| dosimetry number | 1           | 1           | 1           | 1           | 2           | 1           | 2           | 1           | 2           | 1           |             |                    |
| Target Organ     | Gy/GBq             |
| Adrenals         | 0,06        | 0,06        | 0,05        | 0,11        | 0,11        | 0,06        | 0,04        | 0,09        | 0,10        | 0,06        | 0,07        | 0,02               |
| Brain            | 0,05        | 0,05        | 0,05        | 0,10        | 0,09        | 0,05        | 0,04        | 0,07        | 0,08        | 0,06        | 0,06        | 0,02               |
| Breasts          |             |             |             | 0,10        | 0,09        | 0,05        | 0,04        | 0,07        | 0,08        | 0,06        | 0,07        | 0,02               |
| Esophagus        | 0,05        | 0,05        | 0,05        | 0,10        | 0,09        | 0,05        | 0,04        | 0,07        | 0,08        | 0,06        | 0,06        | 0,02               |
| Eyes             | 0,05        | 0,05        | 0,05        | 0,10        | 0,09        | 0,05        | 0,04        | 0,07        | 0,08        | 0,06        | 0,06        | 0,02               |
| Gallbladder Wall | 0,05        | 0,05        | 0,05        | 0,10        | 0,10        | 0,06        | 0,04        | 0,08        | 0,09        | 0,06        | 0,07        | 0,02               |
| Left colon       | 0,05        | 0,05        | 0,05        | 0,10        | 0,10        | 0,05        | 0,04        | 0,08        | 0,09        | 0,06        | 0,07        | 0,02               |
| Small Intestine  | 0,05        | 0,05        | 0,05        | 0,10        | 0,10        | 0,05        | 0,04        | 0,08        | 0,09        | 0,06        | 0,07        | 0,02               |
| Stomach Wall     | 0,05        | 0,05        | 0,05        | 0,10        | 0,10        | 0,05        | 0,04        | 0,08        | 0,08        | 0,06        | 0,07        | 0,02               |
| Right colon      | 0,05        | 0,05        | 0,05        | 0,10        | 0,10        | 0,05        | 0,04        | 0,08        | 0,09        | 0,06        | 0,07        | 0,02               |
| Rectum           | 0,05        | 0,05        | 0,05        | 0,10        | 0,09        | 0,05        | 0,04        | 0,07        | 0,08        | 0,06        | 0,07        | 0,02               |
| Heart Wall       | 0,05        | 0,05        | 0,05        | 0,10        | 0,09        | 0,05        | 0,04        | 0,07        | 0,08        | 0,06        | 0,07        | 0,02               |
| Kidneys          | <b>0,6</b>  | <b>0,5</b>  | <b>0,5</b>  | <b>0,6</b>  | <b>1,4</b>  | <b>0,9</b>  | <b>0,4</b>  | <b>2,0</b>  | <b>2,0</b>  | <b>0,6</b>  | <b>1,0</b>  | <b>0,6</b>         |
| Liver            | 0,05        | 0,05        | 0,05        | 0,10        | 0,10        | 0,05        | 0,04        | 0,08        | 0,09        | 0,06        | 0,07        | 0,02               |
| Lungs            | 0,05        | 0,05        | 0,05        | 0,10        | 0,09        | 0,05        | 0,04        | 0,07        | 0,08        | 0,06        | 0,06        | 0,02               |
| Ovaries          |             |             |             | 0,10        | 0,10        | 0,05        | 0,04        | 0,07        | 0,08        | 0,06        | 0,07        | 0,02               |
| Pancreas         | 0,05        | 0,05        | 0,05        | 0,10        | 0,10        | 0,06        | 0,04        | 0,08        | 0,09        | 0,06        | 0,07        | 0,02               |
| Prostate         | 0,05        | 0,05        | 0,05        |             |             |             |             |             |             |             | 0,05        | 0,00               |
| Salivary Glands  | 0,05        | 0,05        | 0,05        | 0,10        | 0,09        | 0,05        | 0,04        | 0,07        | 0,08        | 0,06        | 0,06        | 0,02               |
| Red Marrow       | <b>0,04</b> | <b>0,04</b> | <b>0,04</b> | <b>0,09</b> | <b>0,07</b> | <b>0,04</b> | <b>0,03</b> | <b>0,07</b> | <b>0,06</b> | <b>0,04</b> | <b>0,05</b> | <b>0,02</b>        |
| Osteogenic Cells | 0,03        | 0,03        | 0,03        | 0,06        | 0,05        | 0,03        | 0,02        | 0,04        | 0,04        | 0,03        | 0,03        | 0,01               |
| Spleen           | 0,05        | 0,05        | 0,05        | 0,10        | 0,10        | 0,06        | 0,04        | 0,08        | 0,09        | 0,06        | 0,07        | 0,02               |
| Testes           | 0,05        | 0,05        | 0,05        |             |             |             |             |             |             |             | 0,05        | 0,00               |
| Thymus           | 0,05        | 0,05        | 0,05        | 0,10        | 0,09        | 0,05        | 0,04        | 0,07        | 0,08        | 0,06        | 0,06        | 0,02               |
| Thyroid          | 0,05        | 0,05        | 0,05        | 0,10        | 0,09        | 0,05        | 0,04        | 0,07        | 0,08        | 0,06        | 0,07        | 0,02               |
| Urinary Bladder  |             |             |             |             |             |             |             |             |             |             |             |                    |
| Wall             | 0,05        | 0,05        | 0,05        | 0,10        | 0,10        | 0,05        | 0,04        | 0,07        | 0,08        | 0,06        | 0,07        | 0,02               |
| Total Body       | <b>0,05</b> | <b>0,05</b> | <b>0,05</b> | <b>0,10</b> | <b>0,10</b> | <b>0,06</b> | <b>0,04</b> | <b>0,08</b> | <b>0,09</b> | <b>0,06</b> | <b>0,07</b> | <b>0,02</b>        |





**Supplemental Table 8** Safety: hematological and renal function before and 6-8 weeks after a PTRT cycle (G: grade; new adverse event or worsening of status before therapy is underlined and marked in bold; eGFR: estimated glomerular filtration rate according to the modification of diet in renal disease, MDRD, formula)

# - patient 3 died after PTRT2

\* There was an additional non-G3 acute (on pre-existing chronic G2) pre-renal renal insufficiency after both 1<sup>st</sup> and 2<sup>nd</sup> cycles, which was reversible.

\*\* Pt. 10 died within 4 weeks of 2<sup>nd</sup> PTRT cycle

| Pt.<br>/ PTRT cycle no. | Hemoglobin<br>(mmol/l) |                  | Leukocyte count<br>(billion cells/l) |                                       | Thrombocyte count<br>(billion cells/l) |              | eGFR<br>(ml/min/1.73 m <sup>2</sup> ) |              |
|-------------------------|------------------------|------------------|--------------------------------------|---------------------------------------|----------------------------------------|--------------|---------------------------------------|--------------|
|                         | Pre-therapy            | Post-therapy     | Pre-therapy                          | Post-therapy                          | Pre-therapy                            | Post-therapy | Pre-therapy                           | Post-therapy |
| Pt. 1                   |                        |                  |                                      |                                       |                                        |              |                                       |              |
| PTRT1                   | 8.6                    | 7.6              | 6.6                                  | 7.8                                   | 139                                    | 166          | >60                                   | >60          |
| CTCAE v5.0<br>grade     | G0                     | <b><u>G1</u></b> | G0                                   | G0                                    | G1                                     | G0           | G0                                    | G0           |
| PTRT2                   | 7.6                    | 6.6              | 7.8                                  | 7.0                                   | 166                                    | 142          | >60                                   | >60          |
| CTCAE v5.0<br>grade     | G1                     | G1               | G0                                   | G0                                    | G0                                     | G1           | G0                                    | G0           |
| Pt. 2                   |                        |                  |                                      |                                       |                                        |              |                                       |              |
| PTRT1                   | 6.8                    | 7.0              | 7.9                                  | 5.2                                   | 399                                    | 376          | >60                                   | >60          |
| CTCAE v5.0<br>grade     | G1                     | G1               | G0                                   | G0                                    | G0                                     | G0           | G0                                    | G0           |
| PTRT2                   | 7.0                    | 6.5              | 5.2                                  | 4.9                                   | 376                                    | 300          | >60                                   | >60          |
| CTCAE v5.0<br>grade     | G1                     | G1               | G0                                   | G0                                    | G0                                     | G0           | G0                                    | G0           |
| Pt. 3 <sup>#</sup>      |                        |                  |                                      |                                       |                                        |              |                                       |              |
| PTRT1                   | 8.9                    | 8.7              | 7.8                                  | 14.1                                  | 223                                    | 321          | >60                                   | >60          |
| CTCAE v5.0<br>grade     | G0                     | G0               | G0                                   | <b><u>Non-G3<br/>leukocytosis</u></b> | G0                                     | G0           | G0                                    | G0           |
| PTRT2                   | 8.7                    |                  | 9.1                                  |                                       | 321                                    |              | >60                                   |              |
| CTCAE v5.0<br>grade     | G0                     |                  | G0                                   |                                       | G0                                     |              | G0                                    |              |

| Pt.<br>/ PTRT cycle no. | Hemoglobin<br>(mmol/l) |                  | Leukocyte count<br>(billion cells/l) |                                       | Thrombocyte count<br>(billion cells/l) |              | eGFR<br>(ml/min/1.73 m <sup>2</sup> ) |              |
|-------------------------|------------------------|------------------|--------------------------------------|---------------------------------------|----------------------------------------|--------------|---------------------------------------|--------------|
|                         | Pre-therapy            | Post-therapy     | Pre-therapy                          | Post-therapy                          | Pre-therapy                            | Post-therapy | Pre-therapy                           | Post-therapy |
| Pt. 4                   |                        |                  |                                      |                                       |                                        |              |                                       |              |
| PTRT1                   | 8.0                    | 8.2              | 7.6                                  | 8.1                                   | 194                                    | 172          | >60                                   | >60          |
| CTCAE v5.0 grade        | G0                     | G0               | G0                                   | G0                                    | G0                                     | G0           | G0                                    | G0           |
| PTRT2                   | 8.7                    | 7.5              | 8.1                                  | 19.2                                  | 170                                    | 155          | >60                                   | >60          |
| CTCAE v5.0 grade        | G0                     | <b><u>G1</u></b> | G0                                   | <b><u>Non-G3<br/>leukocytosis</u></b> | G0                                     | G0           | G0                                    | G0           |
| Pt. 5                   |                        |                  |                                      |                                       |                                        |              |                                       |              |
| PTRT1                   | 6.9                    | 6.3              | 3.4                                  | 2.4                                   | 140                                    | 167          | >60                                   | >60          |
| CTCAE v5.0 grade        | G1                     | G1               | G1                                   | <b><u>G2</u></b>                      | G1                                     | G0           | G0                                    | G0           |
| PTRT2                   | 6.3                    | 6.0              | 3.0                                  | 2.4                                   | 167                                    | 128          | >60                                   | >60          |
| CTCAE v5.0 grade        | G1                     | <b><u>G2</u></b> | G1                                   | <b><u>G2</u></b>                      | G0                                     | G1           | G0                                    | G0           |
| Pt. 6                   |                        |                  |                                      |                                       |                                        |              |                                       |              |
| PTRT1                   | 5.6                    | 5.8              | 2.2                                  | 2.2                                   | 90                                     | 121          | 55                                    | 41           |
| CTCAE v5.0 grade        | G2                     | G2               | G2                                   | G2                                    | G1                                     | G1           | G2                                    | G2*          |
| PTRT2                   | 5.8                    | 6.3              | 2.2                                  | 1.6                                   | 127                                    | 89           | 56                                    | 32           |
| CTCAE v5.0 grade        | G2                     | G2               | G2                                   | <b><u>G3</u></b>                      | G1                                     | G1           | G2                                    | G2*          |

| / PTRT cycle<br>no. | Hemoglobin<br>(mmol/l) |                  | Leukocyte count<br>(billion cells/l) |                                       | Thrombocyte count<br>(billion cells/l) |                  | eGFR<br>( ml/min/1.73 m <sup>2</sup> ) |              |
|---------------------|------------------------|------------------|--------------------------------------|---------------------------------------|----------------------------------------|------------------|----------------------------------------|--------------|
|                     | Pre-therapy            | Post-therapy     | Pre-therapy                          | Post-therapy                          | Pre-therapy                            | Post-therapy     | Pre-therapy                            | Post-therapy |
| PT. 7               |                        |                  |                                      |                                       |                                        |                  |                                        |              |
| PTRT1               | 7.0                    | 7.1              | 9.1                                  | 18.8                                  | 187                                    | 241              | >60                                    | >60          |
| CTCAE v5.0<br>grade | G1                     | G1               | G0                                   | <b><u>Non-G3<br/>leukocytosis</u></b> | G0                                     | G0               | G0                                     | G0           |
| PTRT2               | 7.1                    | 6.0              | 8.7                                  | 8.9                                   | 241                                    | 188              | >60                                    | >60          |
| CTCAE v5.0<br>grade | G1                     | <b><u>G2</u></b> | G0                                   | G0                                    | G0                                     | G0               | G0                                     | G0           |
| Pt.8                |                        |                  |                                      |                                       |                                        |                  |                                        |              |
| PTRT1               | 5.9                    | 5.9              | 2.8                                  | 3.7                                   | 145                                    | 140              | >60                                    | >60          |
| CTCAE v5.0<br>grade | G2                     | G2               | G2                                   | G1                                    | G1                                     | G1               | G0                                     | G0           |
| PTRT2               | 5.9                    | 5.1              | 3.7                                  | 2.9                                   | 140                                    | 101              | >60                                    | >60          |
| CTCAE v5.0<br>grade | G2                     | G2               | G1                                   | G2                                    | G1                                     | G1               | G0                                     | G0           |
| PTRT3               | 5.1                    | 4.7              | 2.9                                  | 1.7                                   | 103                                    | 38               | >60                                    | >60          |
| CTCAE v5.0<br>grade | G2                     | <b><u>G3</u></b> | G2                                   | <b><u>G3</u></b>                      | G1                                     | <b><u>G3</u></b> | G0                                     | G0           |

| Pt. / PTRT cycle no. | Hemoglobin (mmol/l) |                  | Leukocyte count (billion cells/l) |                                   | Thrombocyte count (billion cells/l) |              | eGFR (ml/min/1.73 m <sup>2</sup> ) |              |
|----------------------|---------------------|------------------|-----------------------------------|-----------------------------------|-------------------------------------|--------------|------------------------------------|--------------|
|                      | Pre-therapy         | Post-therapy     | Pre-therapy                       | Post-therapy                      | Pre-therapy                         | Post-therapy | Pre-therapy                        | Post-therapy |
| Pt. 9                |                     |                  |                                   |                                   |                                     |              |                                    |              |
| PTRT1                | 7.8                 | 8.2              | 3.2                               | 4.3                               | 83                                  | 146          | >60                                | >60          |
| CTCAE v5.0 grade     | G0                  | G0               | G1                                | G0                                | G1                                  | G1           | G0                                 | G0           |
| PTRT2                | 8.2                 | 8.0              | 4.3                               | 4.2                               | 146                                 | 132          | >60                                | >60          |
| CTCAE v5.0 grade     | G0                  | G0               | G0                                | G0                                | G1                                  | G1           | G0                                 | G0           |
| Pt.10**              |                     |                  |                                   |                                   |                                     |              |                                    |              |
| PTRT1                | 6.6                 | 7.1              | 4.2                               | 5.8                               | 197                                 | 250          | >60                                | >60          |
| CTCAE v5.0 grade     | G1                  | G1               | G0                                | G0                                | G0                                  | G0           | G0                                 | G0           |
| PTRT2*               | 7.1                 |                  | 5.8                               |                                   | 232                                 |              | >60                                |              |
| CTCAE v5.0 grade     | G1                  |                  | G0                                |                                   | G0                                  |              | G0                                 |              |
| Pt. 11               |                     |                  |                                   |                                   |                                     |              |                                    |              |
| PTRT1                | 8.3                 | 6.1              | 7.3                               | 17.4                              | 261                                 | 300          | >60                                | >60          |
| CTCAE v5.0 grade     | G0                  | <b><u>G2</u></b> | G0                                | <b><u>Non-G3 leukocytosis</u></b> | G0                                  | G0           | G0                                 | G0           |

**Supplemental Table 9** Course of tumor markers in the respective tumor entities (A, before 1<sup>st</sup> PTRT; B, 4 weeks after 1<sup>st</sup> PTRT; C, 8 weeks after 1<sup>st</sup> PTRT; D, 4 weeks after 2<sup>nd</sup> PTRT; E, 8 weeks after 2<sup>nd</sup> PTRT)

|    |        |        |        |        |        |                |
|----|--------|--------|--------|--------|--------|----------------|
| 1  | >10000 | >10000 | >10000 | >10000 | >10000 |                |
| 2  | 2289   | 2467   | 2819   | 1934   | 3107   |                |
| 3  | 1671   | 5610   | >10000 | *      | *      | CA 19-9 (U/ml) |
| 4  | >10000 | >10000 | >10000 | >10000 | >10000 |                |
| 5  | 310    | 301    | 231    | 272    | 365    |                |
| 11 | 24     | 24     | *      | *      | *      |                |
| 6  | 269,8  | 277,7  | 277,7  | 361,9  | 721,2  |                |
| 7  | 162,6  | 156    | 168    | 155    | 267,1  | CA 15-3 (U/ml) |
| 8  | 112,3  | 121,1  | 139    | 132    | 144    |                |
| 9  | 36     | 29     | 31     | 30     | 39     |                |
| 10 | 1793   | 1984   | 1826   | 1737   | 3230   | CA 125 (U/ml)  |
